# Supplementary material
Source: PubMed Central journal article supplement (PMC6440243)
Supplement: jamaoncol-5-91-s001.pdf [file jamaoncol-5-91-s001.pdf]

## Supplementary Online Content

Kishan AU, Wang X, Seiferheld W, et al. Association of gleason grade with the effect of androgen deprivation therapy duration on survival outcomes: an individual patient-level meta-analysis of 6 randomized clinical trials [published online September 20, 2018]. *JAMA Oncol*. doi:10.1001/jamaoncol.2018.3732

**eFigure 1.** Preferred Reporting Items for Systematic Reviews and Meta-Analyses Flowchart

**eFigure 2.** Network Plot of Randomized Trials with Available Direct Comparisons

**eFigure 3.** Forest Plots Derived from Network Meta-Analysis of Androgen Deprivation Therapy Effect on Survival Outcomes, Stratified by Gleason Grade

**eFigure 4.** Forest Plots of the Effect of Gleason Grade Group 4 vs. 5 on Survival Outcomes, Stratified by Androgen Deprivation Therapy (ADT) Duration

**eTable 1.** Summary of Trials Included in Network Meta-Analysis

**eTable 2.** Patient Demographics

**eTable 3.** Individual Study Cox Proportional Hazard Models

**eTable 4.** Network Meta-Analysis of Androgen Deprivation Therapy on Survival Outcomes

This supplementary material has been provided by the authors to give readers additional information about their work.

**eFigure 1. Preferred Reporting Items for Systematic Reviews and Meta-Analyses Flowchart**

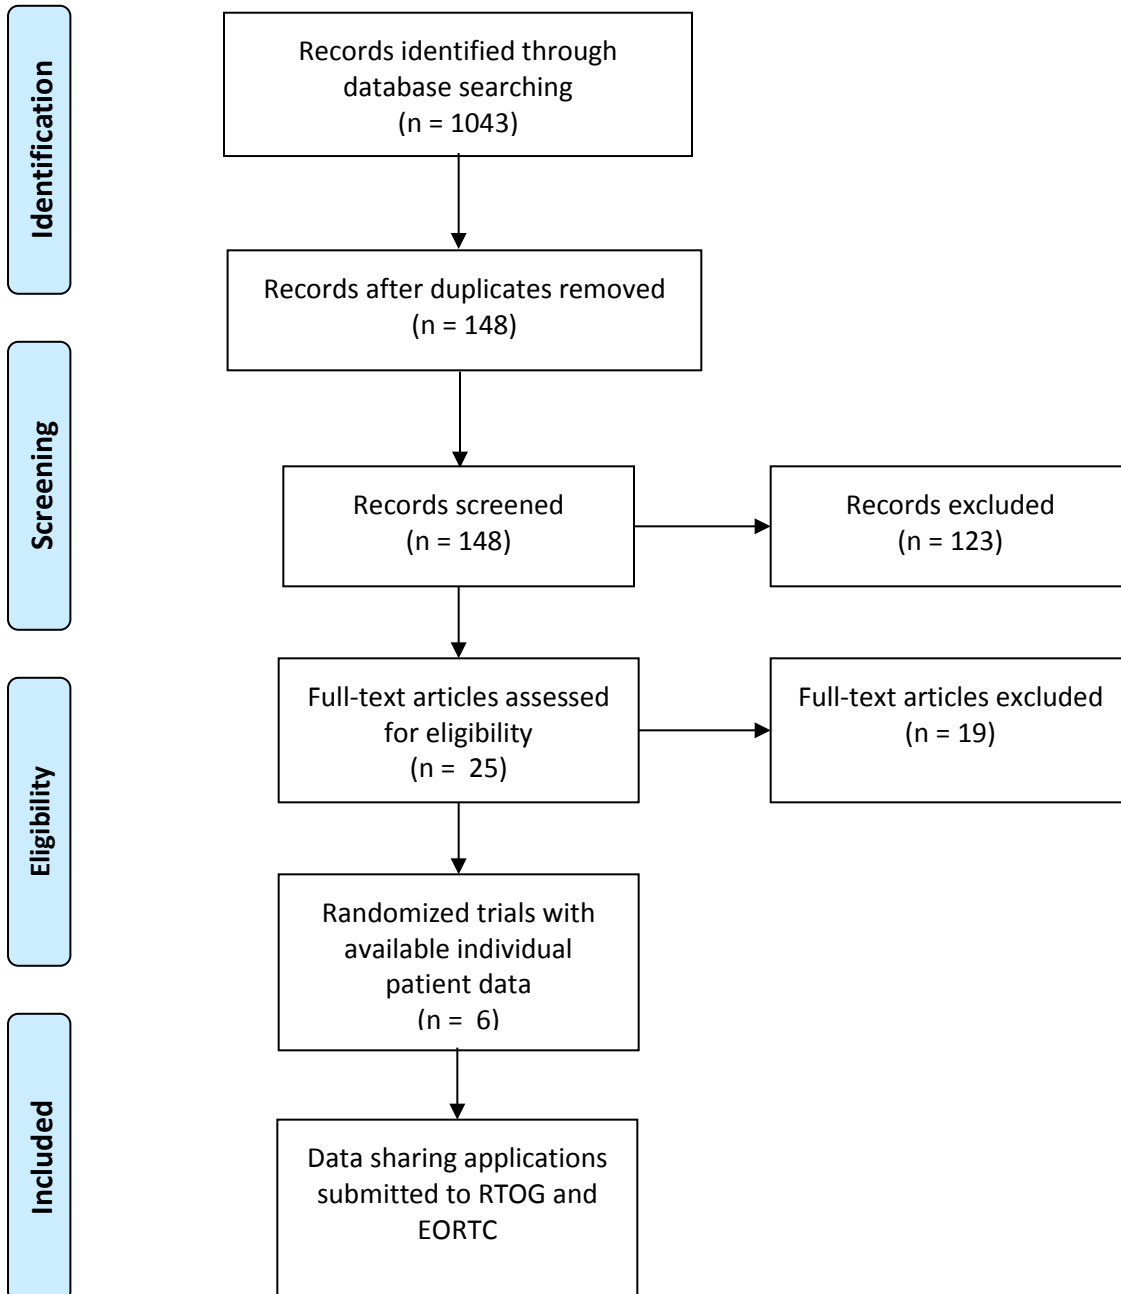

**eFigure 2. Network Plot of Randomized Trials with Available Direct Comparisons**

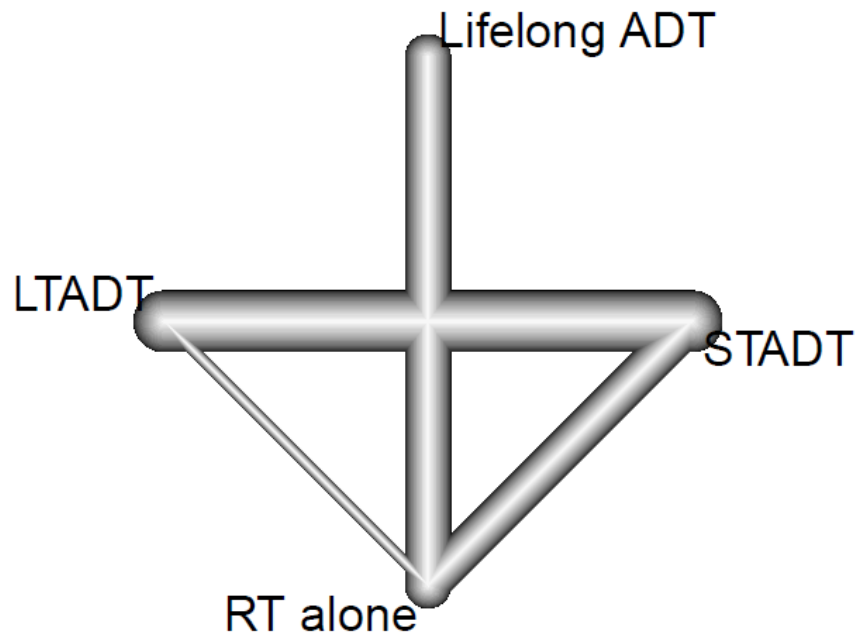

**eFigure 2: Network Plot to Illustrate Randomized Trials with Available Direct Comparisons.** Lines represent the presence of direct comparison trial(s). The width of the line is proportional to the number of trials with direct comparisons.

**eFigure 3. Forest Plots Derived from Network Meta-Analysis of Androgen Deprivation Therapy Effect on Survival Outcomes, Stratified by Gleason Grade Group 4 vs. 5**

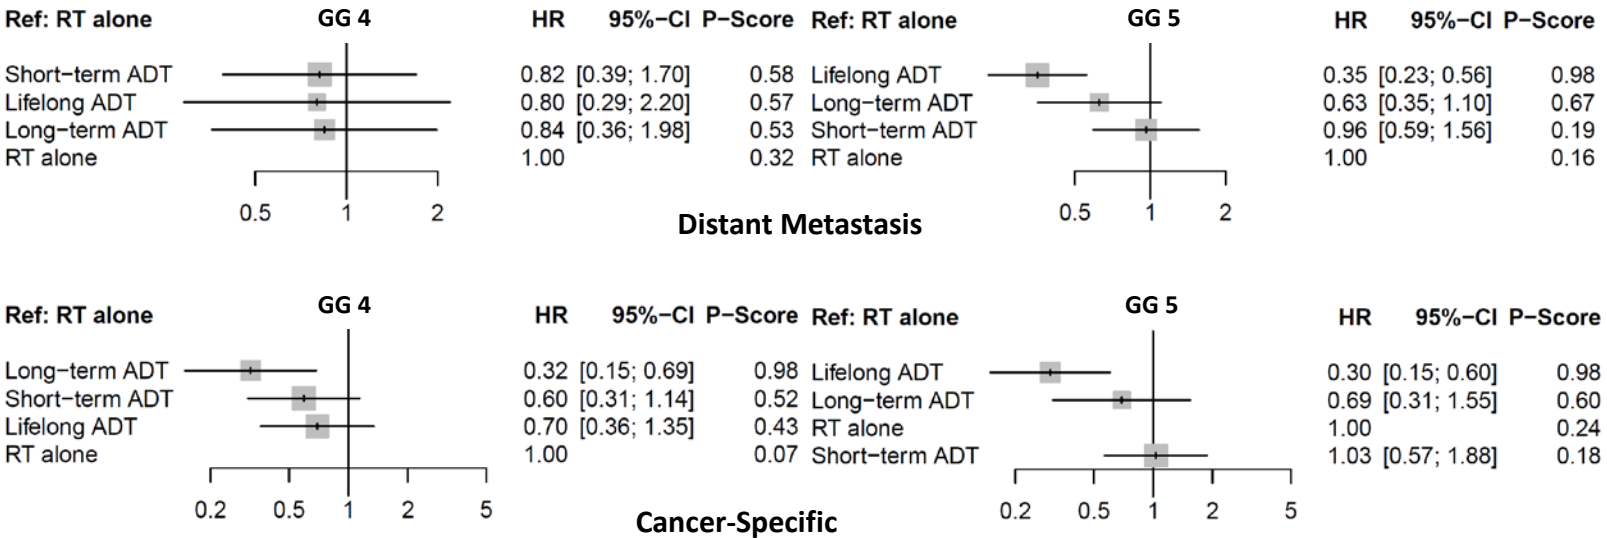

**eFIGURE 3. Forest Plots Derived from Network Meta-Analysis of Androgen Deprivation Therapy Effect on Survival Outcomes, Stratified by Gleason Grade Group 4 vs. 5.** Note that the reference value (HR 1.00) for each forest plot is radiation therapy (RT) alone. The hazard ratios (HRs) and 95% confidence intervals (95% CI) are presented in ascending order, with their associated P-score (a frequentist analogue to the surface under the cumulative ranking curve). GG, Gleason grade group.

**eFigure 4. Forest Plots of the Effect of Gleason Grade Group 4 vs. 5 on Survival Outcomes, Stratified by Androgen Deprivation Therapy (ADT) Duration**

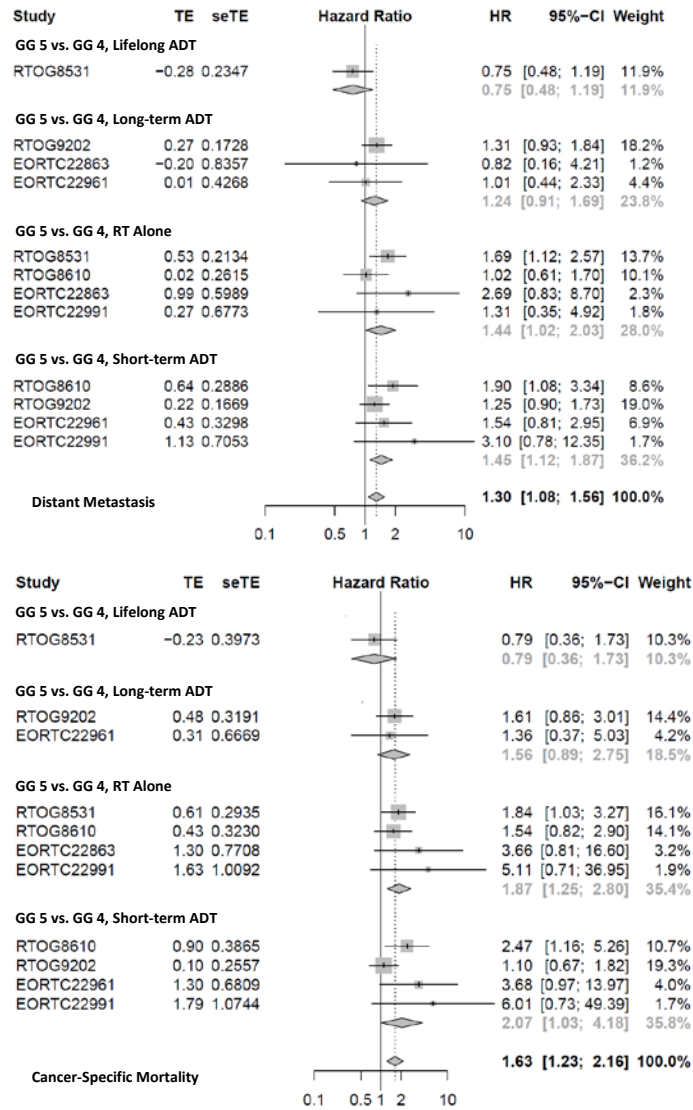

**eFIGURE 4. Forest Plots of the Effect of Gleason Grade Group 4 vs. 5 on Survival Outcomes, Stratified by Androgen Deprivation Therapy (ADT) Duration.** An overall hazard ratio (HR) and 95% confidence interval (95% CI) bestowed by having Gleason score 9-10 vs. Gleason score 8 disease is presented in boldface at the bottom right. HRs and 95% CI for each ADT duration stratum are presented, along with corresponding treatment effect (TE; log[HR]) and the standard error of the TE (seTE).

**eTable 1. Summary of Trials Included in Network Meta-Analysis**

| Trial       | Arms                  | Inclusion*                                                    | Staging Workup                                                                                                                 | Primary Endpoint                  | ADT Regimen                        | RT Dose                                    |
|-------------|-----------------------|---------------------------------------------------------------|--------------------------------------------------------------------------------------------------------------------------------|-----------------------------------|------------------------------------|--------------------------------------------|
| ROTG 8531   | RT vs RT+Lifelong ADT | cT1-T2N+ or cT3-4 <25 cm <sup>2**</sup>                       | Bone scan, chest x-ray; lymph node assessment by lymphangiogram, CT, or lymph node sampling                                    | Survival and disease progression  | q1month LHRH agonist               | 65-70 Gy to prostate<br>44-46 Gy to pelvis |
| ROTG 8610   | RT vs RT+ STADT       | cT2-T4 ≥25 cm <sup>2</sup>                                    | Bone scan, chest x-ray; lymph node assessment by lymphangiogram, CT, or lymph node sampling                                    | Locoregional control              | q1month LHRH agonist + 4 months AA | 65-70 Gy to prostate<br>44-46 Gy to pelvis |
| ROTG 9202   | RT+STADT vs RT+LTADT  | cT2-4N0-X, PSA<150                                            | Bone scan, chest x-ray; lymph node assessment by lymphangiogram, CT, or lymph node sampling                                    | Disease free survival             | Q1month LHRH agonist + 4 months AA | 65-70 Gy to prostate<br>44-46 Gy to pelvis |
| EORTC 22863 | RT vs RT + LTADT      | cT1-2N0 WHO grade 3<br>cT3-4N0                                | Bone scan, chest X-ray, liver ultrasound or CT; allowed lymph node assessment by CT, bipedal lymphangiography, lymphadenectomy | Disease free survival             | q1month LHRH agonist + 1 month AA  | 70 Gy to prostate<br>50 Gy to pelvis       |
| EORTC 22961 | RT+STADT vs RT+LTADT  | cT1c-2bN+<br>cT3-4N0<br>PSA<40xULN                            | Bone scan, chest X-ray, CT or MRI of abdomen and pelvis; lymphadenectomy allowed                                               | Overall survival                  | q1-3 month LHRH agonist + 6 mos AA | 70 Gy to prostate<br>50 Gy to pelvis       |
| EORTC 22991 | RT vs RT+ STADT       | cT1b-c, with PSA≥ 10 ng/mL or Gleason ≥ 7<br>cT2a with PSA≤50 | Bone scan for PSA>10 ng/mL, chest x-ray, CT or MRI of abdomen and pelvis                                                       | Biochemical disease free survival | q3month LHRH agonist + 1 month AA  | 70-78 Gy to prostate<br>46 Gy to pelvis    |

AA, anti-androgen; ADT, androgen deprivation therapy; CT, computed tomography; LHRH, luteinizing hormone releasing hormone; LTADT, long term ADT; MRI, magnetic resonance imaging; RT, radiation therapy; STADT, short-term ADT

\*Patients with cN+ or pN+ disease were included on several protocols, but were not included in our analysis.

\*\*ROTG 8531 also included patients with high-risk features after radical prostatectomy, who were not included in our analysis.

**eTable 2. Patient Demographics**

|                                                                        | <b>Overall</b>           | <b>GG 4</b>                 | <b>GG 5</b>              |
|------------------------------------------------------------------------|--------------------------|-----------------------------|--------------------------|
| <b>Age, mean, median<br/>(range, min-maximum)<br/>(years)</b>          | 69.8, 70<br>(43-88)      | 69.5, 70<br>(49-88)         | 70.2, 71<br>(43-88)      |
| <b>Initial PSA, mean, median<br/>(range, min-maximum)<br/>(ng/dL)*</b> | 30.3, 18.8<br>(0.12-200) | 28.76, 18.62<br>(1.2-172.7) | 32.5, 18.9<br>(0.12-200) |
| <b>Clinical Tumor Stage</b>                                            |                          |                             |                          |
| 1                                                                      | 48 (5%)                  | 35 (6%)                     | 13 (3%)                  |
| 2                                                                      | 270 (27%)                | 175 (29%)                   | 95 (24%)                 |
| 3                                                                      | 636 (64%)                | 368 (62%)                   | 268 (67%)                |
| 4                                                                      | 38 (4%)                  | 15 (3%)                     | 23 (6%)                  |

GG, Gleason grade group

\*Initial PSA not available for RTOG 8531 and EORTC 22961, and only available for some patients on RTOG 8610, EORTC 22863, and EORTC 22991

**eTable 3. Individual Study Cox Proportional Hazard Models**

| Study                                     | DMFS                         |                              | CSS                          |                               | OS                           |                              |
|-------------------------------------------|------------------------------|------------------------------|------------------------------|-------------------------------|------------------------------|------------------------------|
|                                           | GG 4                         | GG 5                         | GG 4                         | GG 5                          | GG 4                         | GG 5                         |
| RTOG 8531:<br>Lifelong ADT vs RT<br>alone | 0.80 (0.52-<br>1.22)         | <b>0.36 (0.23-<br/>0.56)</b> | 0.70 (0.36-<br>1.34)         | <b>0.3 (0.15-<br/>0.60)</b>   | 0.84 (0.54-<br>1.30)         | <b>0.48 (0.31-<br/>0.76)</b> |
| RTOG 8610:<br>STADT vs RT alone           | 0.63 (0.37-<br>1.08)         | 1.17 (0.69-<br>1.99)         | 0.68 (0.32-<br>1.44)         | 1.09 (0.58-<br>2.05)          | 0.79 (0.46-<br>1.37)         | 1.43 (0.83-<br>2.44)         |
| RTOG 9202: LTADT<br>vs STADT              | <b>0.69 (0.5-<br/>0.95)</b>  | 0.72 (0.51-<br>1.03)         | <b>0.45 (0.26-<br/>0.79)</b> | 0.67 (0.37-<br>1.19)          | <b>0.72 (0.52-<br/>0.99)</b> | 0.79 (0.55-<br>1.13)         |
| EORTC 22863:<br>LTADT vs RT alone         | <b>0.30 (0.12-<br/>0.81)</b> | <b>0.09(0.02-<br/>0.49)*</b> | <b>0.19 (0.04-<br/>0.97)</b> | <b>0.03 (0.00-<br/>0.57)*</b> | <b>0.26 (0.09-<br/>0.79)</b> | <b>0.09 (0.01-<br/>0.56)</b> |
| EORTC 22961:<br>LTADT vs STADT            | 0.88 (0.49-<br>1.57)         | 0.57 (0.24-<br>1.39)         | 1.89 (0.51-<br>6.97)         | 0.70 (0.19-<br>2.63)          | 0.91 (0.48-<br>1.73)         | 0.60 (0.23-<br>1.56)         |
| EORTC 22991:<br>STADT vs RT alone         | 0.42 (0.15-<br>1.13)         | 0.99 (0.20-<br>4.88)         | 0.53 (0.07-<br>3.78)         | 0.62 (0.09-<br>4.34)          | <b>0.33 (0.12-<br/>0.95)</b> | 0.66 (0.12-<br>3.78)         |

ADT, androgen deprivation therapy; CSS, cancer-specific survival; DMFS, distant metastasis-free survival; GG, Gleason grade group; LTADT, long term ADT; OS, overall survival; RT, radiation therapy; STADT, short-term ADT

Hazard ratios are shown above, with 95% confidence intervals in parentheses.

\*The DMFS and CSS estimates from EORTC 22863 are unstable



**eTable 4. Network Meta-Analysis of Androgen Deprivation Therapy on Survival Outcomes**

|                                                     | DMFS              |                            | CSS                        |                            | OS                         |                             |
|-----------------------------------------------------|-------------------|----------------------------|----------------------------|----------------------------|----------------------------|-----------------------------|
|                                                     | GG 4              | GG 5                       | GG 4                       | GG 5                       | GG 4                       | GG 5                        |
| <b>RT Alone As Reference (n=140 GG 4, 91 GG 5)*</b> |                   |                            |                            |                            |                            |                             |
| STADT                                               | 0.82 (0.39, 1.70) | 0.96 (0.59, 1.56)          | 0.60 (0.31, 1.14)          | 1.03 (0.57, 1.88)          | <b>0.59 (0.38, 0.93)**</b> | 1.13 (0.69, 1.87)           |
| LTADT                                               | 0.84 (0.36, 1.98) | 0.63 (0.35, 1.10)          | <b>0.32 (0.15, 0.69)**</b> | 0.69 (0.31, 1.55)          | <b>0.43 (0.26, 0.72)**</b> | 0.80 (0.45, 1.44)           |
| Lifelong ADT***                                     | 0.80 (0.29, 2.20) | <b>0.35 (0.23, 0.56)**</b> | 0.70 (0.35, 1.35)          | <b>0.30 (0.15, 0.60)**</b> | 0.84 (0.54, 1.30)          | <b>0.48 (0.31, 0.76) **</b> |
| <b>STADT as Reference (n=214 GG 4, 151 GG 5)</b>    |                   |                            |                            |                            |                            |                             |
| LTADT                                               | 1.04 (0.54, 2.00) | <b>0.65 (0.47, 0.90)**</b> | <b>0.54 (0.33, 0.87)**</b> | 0.67 (0.39, 1.14)          | <b>0.73 (0.55, 0.96)**</b> | <b>0.71 (0.51, 0.99) **</b> |
| Lifelong ADT                                        | 0.98(0.28, 3.42)  | <b>0.37 (0.19, 0.72)**</b> | 1.17 (0.46, 2.96)          | <b>0.29 (0.12, 0.73)**</b> | 1.42 (0.76, 2.66)          | <b>0.43 (0.22, 0.83)**</b>  |
| <b>LTADT as Reference (n=59 GG 4, 49 GG 5)</b>      |                   |                            |                            |                            |                            |                             |
| Lifelong ADT                                        | 0.94 (0.25, 3.55) | 0.57 (0.27, 1.17)          | 2.18 (0.79, 6.00)          | 0.43 (0.15, 1.26)          | 1.94 (1.00, 3.87)          | 0.60 (0.29, 1.26)           |

ADT, androgen deprivation therapy; CSS, cancer-specific survival; DMFS, distant metastasis-free survival; GG, Gleason grade group; LTADT, long term ADT; OS, overall survival; RT, radiation therapy; STADT, short-term ADT

Hazard ratios are shown above, with 95% confidence intervals in parentheses.

\*Due to instability in estimates (due to the small sample size and event size), GG 6 patients enrolled on EORTC 22863 were excluded from analysis for CSS, hence the slightly different numbers than in Table 1\*\*Indicates p<0.05
